# Supplementary material for: Gluten-Free Cereals and Pseudocereals as a Potential Source of Exposure to Toxic Elements among Polish Residents
Source: MDPI journal article supplement (doi:10.3390/nu14112342), 2022-06-03
Supplement: s1 [file s1]

**General questions**

1. Age:
2. Sex:
  - a. Female
  - b. Male
3. Height:
4. Weight:

**Section 1: Buckwheat products**

1. Do you consume buckwheat products? If no, please go to the next section.
  - a. Yes
  - b. No
2. Please check the appropriate answer.

| Type of product           | The frequency of consumption |                   |            |                    |             |              |                        |
|---------------------------|------------------------------|-------------------|------------|--------------------|-------------|--------------|------------------------|
|                           | I do not consume             | A few times a day | Once a day | A few times a week | Once a week | Once a month | Less than once a month |
| Roasted buckwheat groats  |                              |                   |            |                    |             |              |                        |
| Buckwheat groats          |                              |                   |            |                    |             |              |                        |
| Buckwheat pasta           |                              |                   |            |                    |             |              |                        |
| Buckwheat flour           |                              |                   |            |                    |             |              |                        |
| Buckwheat flakes          |                              |                   |            |                    |             |              |                        |
| Expanded buckwheat groats |                              |                   |            |                    |             |              |                        |

3. Please estimate the quantity of buckwheat products consumed at one time (the quantity refers to the raw product; 1 portion of the product= 50 g or ½ bag).

| Type of product | The portion size |             |           |            |            |                     |
|-----------------|------------------|-------------|-----------|------------|------------|---------------------|
|                 | Not applicable   | 1/2 portion | 1 portion | 2 portions | 3 portions | 4 portions and more |
| Roasted         |                  |             |           |            |            |                     |

|                  |  |  |  |  |  |  |
|------------------|--|--|--|--|--|--|
| buckwheat groats |  |  |  |  |  |  |
| Buckwheat groats |  |  |  |  |  |  |
| Buckwheat flakes |  |  |  |  |  |  |
| Buckwheat flour  |  |  |  |  |  |  |

4. Please estimate the quantity of buckwheat pasta consumed at one time (the quantity refers to the raw product; 1 portion of the product= 1 glass= 80 g).

| Type of product | The portion size |             |           |            |            |                     |
|-----------------|------------------|-------------|-----------|------------|------------|---------------------|
|                 | Not applicable   | 1/2 portion | 1 portion | 2 portions | 3 portions | 4 portions and more |
| Buckwheat pasta |                  |             |           |            |            |                     |

5. Please estimate the quantity of expanded buckwheat groats consumed at one time (the quantity refers to the raw product; 1 portion of the product= one glass= 15 g).

| Type of product           | The portion size |             |           |            |            |                     |
|---------------------------|------------------|-------------|-----------|------------|------------|---------------------|
|                           | Not applicable   | 1/2 portion | 1 portion | 2 portions | 3 portions | 4 portions and more |
| Expanded buckwheat groats |                  |             |           |            |            |                     |

## **Section 2: Millet products**

- Do you consume millet products? If no, please go to the next section.
  - Yes
  - No
- Please check the appropriate answer.

| Type of product | The frequency of consumption |                   |            |                    |             |              |                        |
|-----------------|------------------------------|-------------------|------------|--------------------|-------------|--------------|------------------------|
|                 | I do not consume             | A few times a day | Once a day | A few times a week | Once a week | Once a month | Less than once a month |
| Millet groats   |                              |                   |            |                    |             |              |                        |

|                        |  |  |  |  |  |  |  |
|------------------------|--|--|--|--|--|--|--|
| Millet flour           |  |  |  |  |  |  |  |
| Millet flakes          |  |  |  |  |  |  |  |
| Expanded millet groats |  |  |  |  |  |  |  |

3. Please estimate the quantity of millet products consumed at one time (the quantity refers to the raw product; 1 portion of the product= 50 g or ½ bag).

| Type of product | The portion size |             |           |            |            |                     |
|-----------------|------------------|-------------|-----------|------------|------------|---------------------|
|                 | Not applicable   | 1/2 portion | 1 portion | 2 portions | 3 portions | 4 portions and more |
| Millet groats   |                  |             |           |            |            |                     |
| Millet flour    |                  |             |           |            |            |                     |
| Millet flakes   |                  |             |           |            |            |                     |

4. Please estimate the quantity of expanded millet consumed at one time (the quantity refers to the raw product; 1 portion of the product= 1 glass= 15 g).

| Type of product        | The portion size |             |           |            |            |                     |
|------------------------|------------------|-------------|-----------|------------|------------|---------------------|
|                        | Not applicable   | 1/2 portion | 1 portion | 2 portions | 3 portions | 4 portions and more |
| Expanded millet groats |                  |             |           |            |            |                     |

### **Section 3: Quinoa**

1. Do you consume quinoa grains? If no, please go to the next section.
  - a. Yes
  - b. No
2. Please check the appropriate answer.

| Type of product | The frequency of consumption |                   |            |                    |             |              |                        |
|-----------------|------------------------------|-------------------|------------|--------------------|-------------|--------------|------------------------|
|                 | I do not consume             | A few times a day | Once a day | A few times a week | Once a week | Once a month | Less than once a month |
| White quinoa    |                              |                   |            |                    |             |              |                        |
| Black quinoa    |                              |                   |            |                    |             |              |                        |

|                 |  |  |  |  |  |  |  |
|-----------------|--|--|--|--|--|--|--|
| Red quinoa      |  |  |  |  |  |  |  |
| Tricolor quinoa |  |  |  |  |  |  |  |

3. Please estimate the quantity of quinoa consumed at one time (the quantity refers to the raw product; 1 portion of the product= 1/2 bag= 50 g).

| Type of product | The portion size |             |           |            |            |                     |
|-----------------|------------------|-------------|-----------|------------|------------|---------------------|
|                 | Not applicable   | 1/2 portion | 1 portion | 2 portions | 3 portions | 4 portions and more |
| White quinoa    |                  |             |           |            |            |                     |
| Black quinoa    |                  |             |           |            |            |                     |
| Red quinoa      |                  |             |           |            |            |                     |
| Tricolor quinoa |                  |             |           |            |            |                     |

#### **Section 4: Corn products**

1. Do you consume corn products? If no, please go to the next section.
  - a. Yes
  - b. No
2. Please check the appropriate answer.

| Type of product | The frequency of consumption |                   |            |                    |             |              |                        |
|-----------------|------------------------------|-------------------|------------|--------------------|-------------|--------------|------------------------|
|                 | I do not consume             | A few times a day | Once a day | A few times a week | Once a week | Once a month | Less than once a month |
| Corn groats     |                              |                   |            |                    |             |              |                        |
| Corn flour      |                              |                   |            |                    |             |              |                        |
| Corn pasta      |                              |                   |            |                    |             |              |                        |
| Corn crisps     |                              |                   |            |                    |             |              |                        |
| Corn cakes      |                              |                   |            |                    |             |              |                        |
| Popcorn         |                              |                   |            |                    |             |              |                        |

3. Please estimate the quantity of corn products consumed at one time (the quantity refers to the raw product; 1 portion of the product= 50 g or ½ bag).

| Type of product | The portion size |             |           |            |            |                     |
|-----------------|------------------|-------------|-----------|------------|------------|---------------------|
|                 | Not applicable   | 1/2 portion | 1 portion | 2 portions | 3 portions | 4 portions and more |
| Corn groats     |                  |             |           |            |            |                     |
| Corn flour      |                  |             |           |            |            |                     |

4. Please estimate the quantity of corn pasta consumed at one time (the quantity refers to the raw product; 1 portion of the product= 1 glass= 80 g).

| Type of product | The portion size |             |           |            |            |                     |
|-----------------|------------------|-------------|-----------|------------|------------|---------------------|
|                 | Not applicable   | 1/2 portion | 1 portion | 2 portions | 3 portions | 4 portions and more |
| Corn pasta      |                  |             |           |            |            |                     |

5. Please estimate the quantity of expanded corn products consumed at one time (1 portion of the crisps or popcorn= 1 handful; 1 portion of cakes= 1 cake).

| Type of product | The portion size |             |           |            |            |                     |
|-----------------|------------------|-------------|-----------|------------|------------|---------------------|
|                 | Not applicable   | 1/2 portion | 1 portion | 2 portions | 3 portions | 4 portions and more |
| Corn crisps     |                  |             |           |            |            |                     |
| Corn cakes      |                  |             |           |            |            |                     |
| Popcorn         |                  |             |           |            |            |                     |

### **Section 5: Oat products**

1. Do you consume oat products? If no, please go to the next section.
  - a. Yes
  - b. No
2. Please check the appropriate answer.

| Type of product | The frequency of consumption |                   |            |                    |             |              |                        |
|-----------------|------------------------------|-------------------|------------|--------------------|-------------|--------------|------------------------|
|                 | I do not consume             | A few times a day | Once a day | A few times a week | Once a week | Once a month | Less than once a month |
| Oat flakes      |                              |                   |            |                    |             |              |                        |
| Oat flour       |                              |                   |            |                    |             |              |                        |
| Oat bran        |                              |                   |            |                    |             |              |                        |
| Oat groats      |                              |                   |            |                    |             |              |                        |

3. Please estimate the quantity of oat products consumed at one time (the quantity refers to the raw product; 1 portion of the product= 50 g or ½ bag).

| Type of product | The portion size |             |           |            |            |                     |
|-----------------|------------------|-------------|-----------|------------|------------|---------------------|
|                 | Not applicable   | 1/2 portion | 1 portion | 2 portions | 3 portions | 4 portions and more |
| Oat flakes      |                  |             |           |            |            |                     |
| Oat groats      |                  |             |           |            |            |                     |
| Oat flour       |                  |             |           |            |            |                     |

4. Please estimate the quantity of oat bran consumed at one time (1 portion of the product= 1 spoon = 7 g).

| Type of product | The portion size |             |           |            |            |                     |
|-----------------|------------------|-------------|-----------|------------|------------|---------------------|
|                 | Not applicable   | 1/2 portion | 1 portion | 2 portions | 3 portions | 4 portions and more |
| Oat bran        |                  |             |           |            |            |                     |
